# Supplementary material
Source: Springer Nature journal article supplement (https://www.springermedizin.de/resource/supplementary/12936_2010_1428_MOESM3_ESM.pdf/9549784)

No malaria\*

*P. falciparum*

*P. vivax*

A

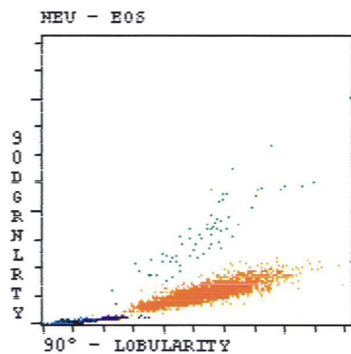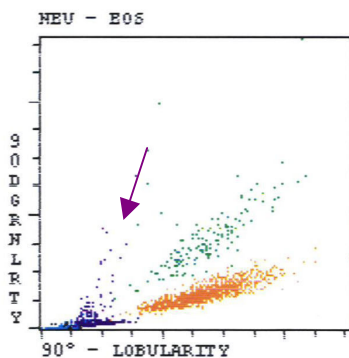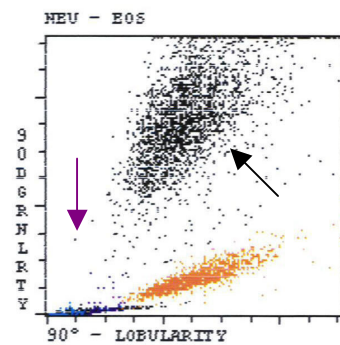

B

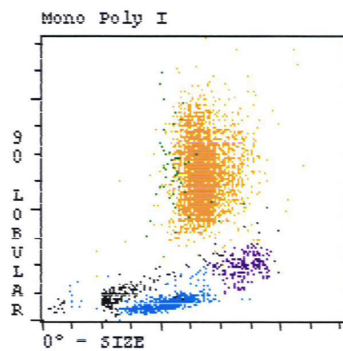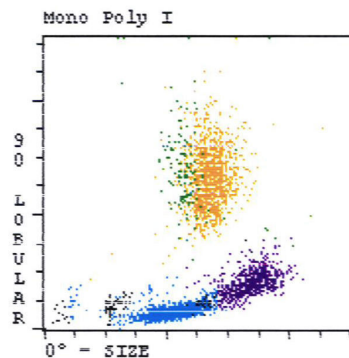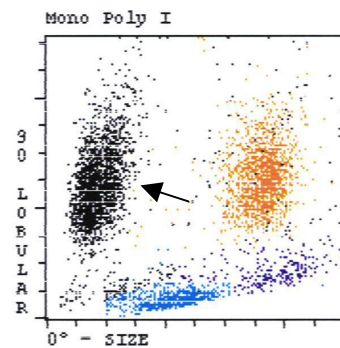

C

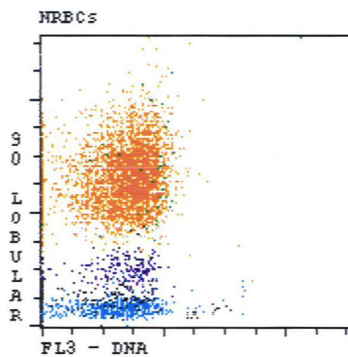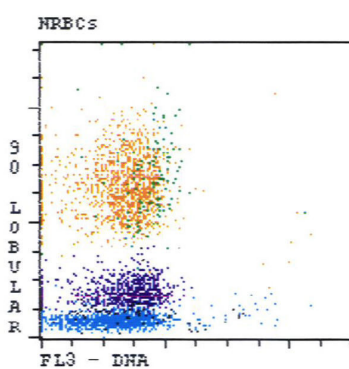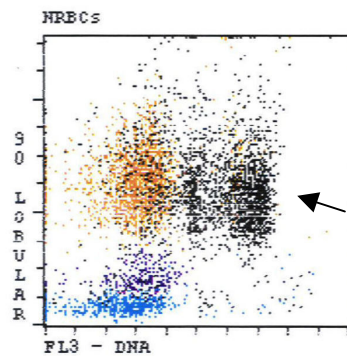

Supplement: MOESM3 [file 9549784]
